# Supplementary material for: Sex-Specific Differences in Hospital Transfers of Nursing Home Residents: Results from the HOspitalizations and eMERgency Department Visits of Nursing Home Residents (HOMERN) Project
Source: PubMed Central journal article supplement (PMC7312075; doi:10.3390/ijerph17113915), 2020-06-01
Supplement: ijerph-17-03915-s001.pdf [file ijerph-17-03915-s001.pdf]

**Table S1.** Characteristics of planned transferred nursing home residents and the respective hospital transfers.

|                                                                                                   | Total Transfers<br>(n = 88) |         | Transfers of<br>Females<br>(n = 42) |         | Transfers of<br>Males<br>(n = 46) |         |
|---------------------------------------------------------------------------------------------------|-----------------------------|---------|-------------------------------------|---------|-----------------------------------|---------|
| <b>Age of the residents at time of hospital transfer (years) *</b>                                |                             |         |                                     |         |                                   |         |
| Mean (SD)                                                                                         | 77.0                        | (9.4)   | 78.1                                | (10.2)  | 76.0                              | (8.5)   |
| ≤ 69                                                                                              | 21                          | (23.9%) | 10                                  | (23.8%) | 11                                | (23.9%) |
| 70–79                                                                                             | 32                          | (36.4%) | 12                                  | (28.6%) | 20                                | (43.4%) |
| 80–89                                                                                             | 28                          | (31.8%) | 17                                  | (40.5%) | 11                                | (23.9%) |
| ≥ 90                                                                                              | 7                           | (8.0%)  | 3                                   | (7.1%)  | 4                                 | (8.7%)  |
| <b>Marital status of the residents *</b>                                                          |                             |         |                                     |         |                                   |         |
| Single                                                                                            | 13                          | (14.8%) | 6                                   | (14.3%) | 7                                 | (15.2%) |
| Married/in a relationship                                                                         | 23                          | (26.1%) | 3                                   | (7.1%)  | 20                                | (43.5%) |
| Divorced/permanently separated                                                                    | 9                           | (10.2%) | 4                                   | (9.5%)  | 5                                 | (10.9%) |
| Widowed                                                                                           | 43                          | (48.9%) | 29                                  | (69.1%) | 14                                | (30.4%) |
| <b>Care grade of the residents *</b>                                                              |                             |         |                                     |         |                                   |         |
| 1 or 2 (few or significant limitations on independence or skills)                                 | 26                          | (30.2%) | 15                                  | (36.6%) | 11                                | (24.4%) |
| 3 (severe limitations on independence or skills)                                                  | 23                          | (26.7%) | 16                                  | (39.0%) | 7                                 | (15.6%) |
| 4 (extremely severe limitations on independence or skills)                                        | 30                          | (34.9%) | 4                                   | (9.8%)  | 26                                | (57.8%) |
| 5 (extremely severe limitations on independence or skills with special demands on care provision) | 7                           | (8.1%)  | 6                                   | (14.6%) | 1                                 | (2.2%)  |
| <b>Dementia diagnosis of the residents *</b>                                                      |                             |         |                                     |         |                                   |         |
| No                                                                                                | 71                          | (80.7%) | 30                                  | (71.4%) | 41                                | (89.1%) |
| Yes                                                                                               | 17                          | (19.3%) | 12                                  | (28.6%) | 5                                 | (10.9%) |
| Stage: mild                                                                                       | 2                           | (12.5%) | 1                                   | (9.1%)  | 1                                 | (20.0%) |
| Stage: moderate                                                                                   | 11                          | (68.8%) | 9                                   | (81.8%) | 2                                 | (40.0%) |
| Stage: severe                                                                                     | 3                           | (18.8%) | 1                                   | (9.1%)  | 2                                 | (40.0%) |
| <b>Barthel Index: residents' activities of daily living (points, ICD-10-GM) *</b>                 |                             |         |                                     |         |                                   |         |
| Mean (SD)                                                                                         | 47.8                        | (26.9)  | 53.5                                | (30.2)  | 42.7                              | (22.6)  |
| 80-100: U50.0/1 (slight/no dependency)                                                            | 12                          | (14.0%) | 10                                  | (24.4%) | 2                                 | (4.4%)  |
| 60-75: U50.2 (mild dependency)                                                                    | 24                          | (27.9%) | 11                                  | (26.8%) | 13                                | (28.9%) |
| 40-55: U50.3 (moderate dependency)                                                                | 14                          | (16.3%) | 6                                   | (14.6%) | 8                                 | (17.8%) |
| 20-35: U50.4 (severe dependency)                                                                  | 29                          | (33.7%) | 8                                   | (19.5%) | 21                                | (46.7%) |
| 0-15: U50.5 (total dependency)                                                                    | 7                           | (8.1%)  | 6                                   | (14.6%) | 1                                 | (2.2%)  |
| <b>Residents' wish for end-of-life care *</b>                                                     |                             |         |                                     |         |                                   |         |
| Unknown                                                                                           | 59                          | (68.6%) | 23                                  | (56.1%) | 36                                | (80.0%) |
| Advance directive available                                                                       | 27                          | (31.4%) | 18                                  | (43.9%) | 9                                 | (20.0%) |
| Full clinical emergency treatment                                                                 | 0                           | (0.0%)  | 0                                   | (0.0%)  | 0                                 | (0.0%)  |
| Limited clinical treatment                                                                        | 16                          | (64.0%) | 8                                   | (50.0%) | 8                                 | (88.9%) |

|                                                                                    |     |         |     |         |     |         |
|------------------------------------------------------------------------------------|-----|---------|-----|---------|-----|---------|
| Preclinical emergency treatment in the NH                                          | 1   | (4.0%)  | 1   | (6.3%)  | 0   | (0.0%)  |
| Assessment not possible                                                            | 8   | (32.0%) | 7   | (43.8%) | 1   | (11.1%) |
| <b>Surprise question (estimating 6-month mortality) *</b>                          |     |         |     |         |     |         |
| Likely                                                                             | 13  | (14.9%) | 5   | (12.2%) | 8   | (17.4%) |
| Unlikely                                                                           | 74  | (85.1%) | 36  | (87.8%) | 38  | (82.6%) |
| <b>Weekday of the hospital transfer *</b>                                          |     |         |     |         |     |         |
| Monday to Friday                                                                   | 83  | (94.3%) | 41  | (97.6%) | 42  | (91.3%) |
| Saturday & Sunday                                                                  | 5   | (5.7%)  | 1   | (2.4%)  | 4   | (8.7%)  |
| <b>Outcome of the hospital transfer *</b>                                          |     |         |     |         |     |         |
| ED visit with discharge to the NH                                                  | 40  | (46.5%) | 12  | (29.3%) | 28  | (62.2%) |
| Hospital admission                                                                 | 46  | (53.5%) | 29  | (70.7%) | 17  | (37.8%) |
| <b>Length of hospital stay [days] **</b>                                           |     |         |     |         |     |         |
| Mean (SD)                                                                          | 7.4 | (9.8)   | 7.6 | (10.8)  | 6.9 | (8.0)   |
| 1 – 4                                                                              | 25  | (56.8%) | 15  | (53.6%) | 10  | (62.5%) |
| 5 – 9                                                                              | 12  | (27.3%) | 9   | (32.1%) | 3   | (18.8%) |
| 10 +                                                                               | 7   | (15.9%) | 4   | (14.3%) | 3   | (18.8%) |
| <b>Reason for hospital transfer</b>                                                |     |         |     |         |     |         |
| Surgery                                                                            | 28  | (32.2%) | 18  | (42.9%) | 10  | (22.2%) |
| Catheter change                                                                    | 21  | (24.1%) | 1   | (2.4%)  | 20  | (44.4%) |
| Scheduled examination<br>(e.g., X-ray, colonoscopy)                                | 18  | (20.7%) | 10  | (23.8%) | 8   | (17.8%) |
| Scheduled therapeutic intervention<br>(e.g., chemotherapy, dialysis, pain therapy) | 9   | (10.3%) | 4   | (9.5%)  | 5   | (11.1%) |
| Wound treatment and check-up<br>(e.g., bandage)                                    | 4   | (4.6%)  | 4   | (9.5%)  | 0   | (0.0%)  |
| Other                                                                              | 7   | (8.1%)  | 5   | (11.9%) | 2   | (4.4%)  |

SD: standard deviation; ICD-10-GM: International Classification of Diseases, 10th version, German Modification; ED: emergency department; NH: nursing home; \*Numbers differ due to missing values; #Only for hospital admissions
